# Supplementary material for: Discontinuation of tyrosine kinase inhibitors in chronic myeloid leukemia: when and for whom?
Source: PubMed Central journal article supplement — Haematologica. 2020 Oct 9;105(12):2738–45. doi: 10.3324/haematol.2019.242891 (PMC7716356; doi:10.3324/haematol.2019.242891), 2020-10-09
Supplement: 2019_242891-Disclosures_Contributions.pdf [file 2019_242891-Disclosures_Contributions.pdf]

Haematologica  
HAEMATOL/2019/242891  
Version 3

Discontinuation of tyrosine kinase inhibitors in chronic myeloid  
leukemia: when and for whom?

Ehab Atallah and Charles A Schiffer

Disclosures: None.

Contributions: Both authors equally contributed
